# Supplementary material
Source: publisher site journal article supplement (https://www.spandidos-publications.com/4745/downloadSupplementary)

Figure S1. Expression of AEG-1 in virus-infected cells. The protein expression level of AEG-1 was markedly lower in the AEG-1-sgRNA virus-infected cell groups compared with that in the negative control group. GAPDH was used as an internal reference. These blots were the uncropped and unedited blots of those presented in Fig. 3B. AEG-1, astrocyte elevated gene-1; sgRNA, single guide RNA.

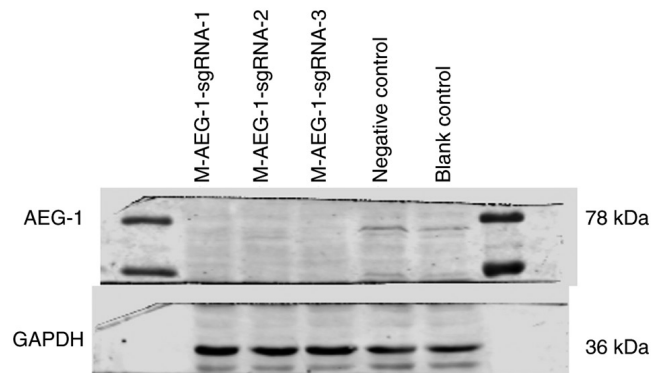

Supplement: Supplementary file 1 [file downloadSupplementary]
